# Supplementary material for: Retro-miRs: novel and functional miRNAs originating from mRNA retrotransposition
Source: Springer Nature journal article supplement (doi:10.1186/s13100-023-00301-w), 2023-09-08
Supplement: MOESM2 [file 13100_2023_301_MOESM2_ESM.pdf]

Table S1. Retro-miRs information

| miRNA (Official name)     | micro-RNA  | mature miRNA                     | Classes | Position                 | mat. miRNA sequence          | Position                 | Retrocopy     | Position                 | Parental Gene | Position                 |
|---------------------------|------------|----------------------------------|---------|--------------------------|------------------------------|--------------------------|---------------|--------------------------|---------------|--------------------------|
| <a href="#">MIR4444-2</a> | mir-4444-2 | <a href="#">hsa-miR-4444</a>     | RTC     | chr3:75214476-75214549   | CUCGAGUUGGAAGAGGCG           | chr3:75214518-75214535   | HNRNPA3P6     | chr3:75214631-75215636   | HNRNPA3       | chr2:177212563-177223958 |
| <a href="#">MIR4426</a>   | mir-4426   | <a href="#">hsa-miR-4426</a>     | EJ      | chr1:192716328-192716390 | GAAGAUGGACGUACUUU            | chr1:192716333-192716349 | RPS27AP5      | chr1:192716132-192716653 | RPS27A        | chr2:55231903-55235853   |
| -                         | mir-4426-1 | <a href="#">hsa-miR-4426</a>     | EJ      | chr16:61055707-61055769  | GAAGAUGGACGUACUUU            | chr16:61055744-61055760  | RPS27AP16     | chr16:61055399-61055964  | RPS27A        | chr2:55231903-55235853   |
| <a href="#">MIR1244-2</a> | mir-1244-2 | <a href="#">hsa-miR-1244</a>     | RTC     | chr5:118974586-118974670 | AAGUAGUUGGUUUGUAGAGAUGGUU    | chr5:118974640-118974665 | PTMAP2        | chr5:118973796-118974122 | PTMA          | chr2:231706895-231713551 |
| <a href="#">MIR1244-3</a> | mir-1244-3 | <a href="#">hsa-miR-1244</a>     | RTC     | chr12:9239467-9239551    | AAGUAGUUGGUUUGUAGAGAUGGUU    | chr12:9239472-9239497    | PTMAP4        | chr12:9239986-9240331    | PTMA          | chr2:231706895-231713551 |
| <a href="#">MIR1244-4</a> | mir-1244-4 | <a href="#">hsa-miR-1244</a>     | RTC     | chr12:12111952-12112036  | AAGUAGUUGGUUUGUAGAGAUGGUU    | chr12:12112006-12112031  | PTMAP9        | chr12:12111163-12111489  | PTMA          | chr2:231706895-231713551 |
| -                         | mir-1244-5 | <a href="#">hsa-miR-1244</a>     | RTC     | chr3:117027474-117027558 | AAGUAGUUGGUUUGUAGAGAUGGUU    | chr3:117027528-117027553 | PTMAP8        | chr3:117026698-117027039 | PTMA          | chr2:231706895-231713551 |
| -                         | mir-1244-6 | <a href="#">hsa-miR-1244</a>     | RTC     | chr14:92027342-92027426  | AAGUAGUUGGUUUGUAGAGAUGGUU    | chr14:92027396-92027421  | RP11-529H2.3  | chr14:92026422-92027567  | PTMA          | chr2:231706895-231713551 |
| <a href="#">MIR3654</a>   | mir-3654   | <a href="#">hsa-miR-3654</a>     | EJ      | chr7:133034860-133034915 | GACUGGACAAGCUGAGGAA          | chr7:133034860-133034878 | RP11-371A22.1 | chr7:133034607-133035920 | EEF1G         | chr11:62559596-62574086  |
| -                         | mir-3654-1 | <a href="#">hsa-miR-3654</a>     | EJ      | chrX:115703812-115703867 | GACUGGACAAGCUGAGGAA          | chrX:115703849-115703867 | EEF1GP5       | chrX:115702811-115704120 | EEF1G         | chr11:62559596-62574086  |
| <a href="#">MIR572</a>    | mir-572    | <a href="#">hsa-miR-572</a>      | Novel   | chr4:11368827-11368921   | GUCCGCUCGGCGUGGCCCA          | chr4:11368887-11368906   | RNPS1P1       | chr4:11368821-11373738   | RNPS1         | chr16:2253116-2268397    |
| <a href="#">MIR622</a>    | mir-622    | <a href="#">hsa-miR-622</a>      | EJ      | chr13:90231182-90231277  | ACAGUCUGCUGAGGUUGGAGC        | chr13:90231242-90231262  | KRT18P27      | chr13:90230384-90231682  | KRT18         | chr12:52948871-52952906  |
| <a href="#">MIR7161</a>   | mir-7161   | <a href="#">hsa-miR-7161-3p</a>  | Novel   | chr6:158609707-158609790 | UAGAUCUUUGACUCUGGCAGUCUCCAGG | chr6:158609763-158609790 | TATDN2P2      | chr6:158609706-158621636 | TATDN2        | chr3:10248023-10281218   |
| <a href="#">MIR7161</a>   | mir-7161   | <a href="#">hsa-miR-7161-5p</a>  | Novel   | chr6:158609707-158609790 | UAAAGACUGUAGAGGCCAUCUGGU     | chr6:158609707-158609729 | TATDN2P2      | chr6:158609706-158621636 | TATDN2        | chr3:10248023-10281218   |
| <a href="#">MIR4788</a>   | mir-4788   | <a href="#">hsa-miR-4788</a>     | Novel   | chr3:134437827-134437906 | UUACGGACCAGCUAAGGGAGGC       | chr3:134437836-134437857 | HMGB3P13      | chr3:134437605-134438211 | HMGB3         | chrX:150980509-150990771 |
| <a href="#">MIR4468</a>   | mir-4468   | <a href="#">hsa-miR-4468</a>     | Novel   | chr7:138123758-138123821 | AGAGCAGAAGGAUGAGAU           | chr7:138123803-138123820 | RCC2P3        | chr7:138122202-138124595 | RCC2          | chr1:17406760-17439677   |
| <a href="#">MIR492</a>    | mir-492    | <a href="#">hsa-miR-492</a>      | EJ      | chr12:94834398-94834513  | AGGACCUCGGGACAAGAUCUUU       | chr12:94834427-94834449  | KRT19P2       | chr12:94834147-94835158  | KRT19         | chr17:41523617-41528308  |
| <a href="#">MIR10527</a>  | mir-10527  | <a href="#">hsa-miR-10527-5p</a> | EJ      | chr12:63823663-63823727  | AAGCAAUGUUGGGUACGCGC         | chr12:63823663-63823685  | PABPC1P4      | chr12:63822021-63823895  | PABPC1        | chr8:100685816-100722809 |

\*\*\* The microRNA nomenclature can be divided into three main components:

- i) The species, which is named using three letters. For example, "hsa" is used to represent microRNAs found in the human genome.
- ii) The microRNA, which indicates whether it refers to the pre-miRNAs (prefixed with "mir," e.g., mir-576) or the mature miRNAs (prefixed with "miR," e.g., miR-576). Precursors are named with a lowercase "r" before "mir," while mature miRNAs are represented with an uppercase "R" in "miR."
- iii) Additional information, which applies to mature miRNAs, may include a type designation at the end of the name. If only one mature miRNA is reported, no additional information is provided (e.g., "hsa-miR-492"). However, if there are two annotations, they are represented as 3p and 5p, indicating the strand of the miRNA. For example, "hsa-miR-7161-3p" and "hsa-miR-7161-5p." In the case of pre-miRNAs, this additional information may indicate the existence of another miRNA gene in a different genomic position but with a similar or identical stem-loop structure. These patterns are numbered using integers, such as 1, 2, 3 (e.g., "hsa-mir-4444-1" and "hsa-mir-4444-2").
