# Supplementary material for: Retro-miRs: novel and functional miRNAs originating from mRNA retrotransposition
Source: Springer Nature journal article supplement (doi:10.1186/s13100-023-00301-w), 2023-09-08
Supplement: MOESM3 [file 13100_2023_301_MOESM3_ESM.pdf]

**Table S2. Retrocopied genes with exonic miRNAs.**

| Parental Gene | Exonic miRNAs | Retrocopie | RTC Position             | With miRNA |  |  |  |
|---------------|---------------|------------|--------------------------|------------|--|--|--|
| KRT18         | N             | KRT18P27   | chr13:90230384-90231682  | Y          |  |  |  |
| TATDN2        | Y             | TATDN2P2   | chr6:158609706-158621636 | Y          |  |  |  |
| RNPS1         | N             | RNPS1P1    | chr4:11368821-11373738   | Y          |  |  |  |
| KRT19         | N             | KRT19P2    | chr12:94834147-94835158  | Y          |  |  |  |
| KRT19         | N             | KRT19P1    | chr6:71584721-71585906   | N          |  |  |  |
| KRT19         | N             | KRT19P3    | chr4:109879070-109879897 | N          |  |  |  |
| KRT19         | N             | KRT19P4    | chr10:68260557-68261499  | N          |  |  |  |
| KRT19         | N             | KRT19P6    | chr4:91885046-91885254   | N          |  |  |  |
| RCC2          | N             | RCC2P3     | chr7:138122202-138124595 | Y          |  |  |  |
| RCC2          | N             | RCC2P1     | chrY:11781052-11782527   | N          |  |  |  |
| RCC2          | N             | RCC2P2     | chrY:19986575-19987852   | N          |  |  |  |
| RCC2          | N             | RCC2P4     | chr3:126766434-126767475 | N          |  |  |  |
| RCC2          | N             | RCC2P5     | chr3:96753185-96754671   | N          |  |  |  |
| RCC2          | N             | RCC2P6     | chr11:62371146-62373168  | N          |  |  |  |
| RCC2          | N             | RCC2P7     | chr6:56431950-56433213   | N          |  |  |  |
| RCC2          | N             | RCC2P8     | chr4:108788745-108789779 | N          |  |  |  |
| EEF1G         | N             | EEF1GP9    | chr7:133034607-133035920 | Y          |  |  |  |
| EEF1G         | N             | EEF1GP5    | chrX:115702811-115704120 | Y          |  |  |  |
| EEF1G         | N             | EEF1GP1    | chr7:125033453-125035301 | N          |  |  |  |
| EEF1G         | N             | EEF1GP2    | chr5:147922179-147923421 | N          |  |  |  |
| EEF1G         | N             | EEF1GP3    | chr3:40596207-40597494   | N          |  |  |  |
| EEF1G         | N             | EEF1GP4    | chr3:161324913-161326219 | N          |  |  |  |
| EEF1G         | N             | EEF1GP8    | chr4:129903010-129904163 | N          |  |  |  |
| EEF1G         | N             | EEF1GP7    | chr1:52573114-52573816   | N          |  |  |  |
| PABPAC1       | Y             | PABPC1P4   | chr12:63822021-63823895  | Y          |  |  |  |
| PABPAC1       | Y             | PABPC1P1   | chr4:39973444-39974338   | N          |  |  |  |
| PABPAC1       | Y             | PABPC1P2   | chr2:146587506-146589310 | N          |  |  |  |
| PABPAC1       | Y             | PABPC1P3   | chrX:74583088-74583546   | N          |  |  |  |
| PABPAC1       | Y             | PABPC1P7   | chr4:102896725-102898237 | N          |  |  |  |
| PABPAC1       | Y             | PABPC1P10  | chr3:155309427-155309807 | N          |  |  |  |

|         |   |                 |                          |   |  |  |  |
|---------|---|-----------------|--------------------------|---|--|--|--|
| PABPAC1 | Y | PABPC1P11       | chr9:17589161-17591318   | N |  |  |  |
| PABPAC1 | Y | PABPC1P15       | chr4:39973128-39973442   | N |  |  |  |
| PABPAC1 | Y | PABPC3          | chr13:25096141-25099255  | N |  |  |  |
| PTMA    | Y | PTMAP2          | chr5:118973796-118974122 | Y |  |  |  |
| PTMA    | Y | PTMAP4          | chr12:9239986-9240331    | Y |  |  |  |
| PTMA    | Y | PTMAP9          | chr12:12111163-12111489  | Y |  |  |  |
| PTMA    | Y | PTMAP8          | chr3:117026698-117027039 | Y |  |  |  |
| PTMA    | Y | PTMAP16         | chr14:92026422-92027567  | Y |  |  |  |
| PTMA    | Y | PTMAP1          | chr6:30633632-30633956   | N |  |  |  |
| PTMA    | Y | PTMAP3          | chr20:18011955-18012284  | N |  |  |  |
| PTMA    | Y | PTMAP5          | chr13:81689911-81691072  | N |  |  |  |
| PTMA    | Y | PTMAP10         | chr7:138404195-138404523 | N |  |  |  |
| PTMA    | Y | PTMAP13         | chr17:76651409-76652084  | N |  |  |  |
| PTMA    | Y | PTMAP14         | chrX:15653107-15653855   | N |  |  |  |
| PTMA    | Y | PTMAP15         | chr8:103559099-103559389 | N |  |  |  |
| HNRNPA3 | Y | HNRNPA3P6       | chr3:75214631-75215636   | Y |  |  |  |
| HNRNPA3 | Y | HNRNPA3P14      | chr1:81426421-81428335   | N |  |  |  |
| HNRNPA3 | Y | HNRNPA3P17      | chr1:113449660-113451119 | N |  |  |  |
| HNRNPA3 | Y | HNRNPA3P1       | chr10:43787125-43790442  | N |  |  |  |
| HNRNPA3 | Y | HNRNPA3P9       | chr11:32591403-32592766  | N |  |  |  |
| HNRNPA3 | Y | HNRNPA3P10      | chr12:51711727-51713612  | N |  |  |  |
| HNRNPA3 | Y | HNRNPA3P5       | chr13:65787546-65788763  | N |  |  |  |
| HNRNPA3 | Y | HNRNPA3P11      | chr15:57246585-57248086  | N |  |  |  |
| HNRNPA3 | Y | HNRNPA3P16      | chr18:50814324-50816778  | N |  |  |  |
| HNRNPA3 | Y | HNRNPA3P20      | chr19:54031410-54031766  | N |  |  |  |
| HNRNPA3 | Y | HNRNPA3P18      | chr2:216174173-216176040 | N |  |  |  |
| HNRNPA3 | Y | HNRNPA3P15      | chr2:197014990-197016725 | N |  |  |  |
| HNRNPA3 | Y | HNRNPA3P2       | chr20:36620402-36621442  | N |  |  |  |
| HNRNPA3 | Y | ENSG00000248977 | chr4:40142207-40142402   | N |  |  |  |
| HNRNPA3 | Y | HNRNPA3P13      | chr4:82128528-82131631   | N |  |  |  |
| HNRNPA3 | Y | HNRNPA3P19      | chr6:25271821-25273808   | N |  |  |  |

|         |   |                 |                           |   |  |  |  |
|---------|---|-----------------|---------------------------|---|--|--|--|
| HNRNPA3 | Y | HNRNPA3P3       | chrX:140032318-140033870  | N |  |  |  |
| RPS27A  | N | RPS27AP5        | chr1:192716132-192716653  | Y |  |  |  |
| RPS27A  | N | RPS27AP16       | chr16:61055399-61055964   | Y |  |  |  |
| RPS27A  | N | RPS27AP6        | chr1:150881206-150881721  | N |  |  |  |
| RPS27A  | N | RPS27AP24       | chr14:27258697-27259175   | N |  |  |  |
| RPS27A  | N | ENSG00000240813 | chr17:10745481-10745815   | N |  |  |  |
| RPS27A  | N | RPS27AP1        | chr17:10258721-10259262   | N |  |  |  |
| RPS27A  | N | RPS27AP19       | chr19:7665678-7666501     | N |  |  |  |
| RPS27A  | N | RPS27AP7        | chr2:47883418-47883933    | N |  |  |  |
| RPS27A  | N | RPS27AP22       | chr2:224294926-224295787  | N |  |  |  |
| RPS27A  | N | RPS27AP2        | chr20:17516801-17517383   | N |  |  |  |
| RPS27A  | N | RPS27AP3        | chr20:37049238-37049745   | N |  |  |  |
| RPS27A  | N | RPS27AP8        | chr3:172225126-172225827  | N |  |  |  |
| RPS27A  | N | RPS27AP18       | chr5:138267027-138267796  | N |  |  |  |
| RPS27A  | N | RPS27AP9        | chr5:80498495-80498998    | N |  |  |  |
| RPS27A  | N | RPS27AP10       | chr5:141588893-141589428  | N |  |  |  |
| RPS27A  | N | RPS27AP11       | chr6:113581463-113581999  | N |  |  |  |
| RPS27A  | N | RPS27AP12       | chr7:157192326-157192862  | N |  |  |  |
| RPS27A  | N | RPS27AP23       | chr7:112446130-112446376  | N |  |  |  |
| RPS27A  | N | RPS27AP13       | chr8:53886980-53887581    | N |  |  |  |
| RPS27A  | N | RPS27AP15       | chr9:72741136-72741625    | N |  |  |  |
| RPS27A  | N | RPS27AP17       | chrX:6989352-6989815      | N |  |  |  |
| RPS27A  | N | RPS27AP20       | chrX:3717122-3717632      | N |  |  |  |
| HMGB3   | N | HMGB3P13        | chr3:134437605-134438211  | Y |  |  |  |
| HMGB3   | N | HMGB3P9         | chr1:92646202-92647649    | N |  |  |  |
| HMGB3   | N | HMGB3P6         | chr1:164356674-164358220  | N |  |  |  |
| HMGB3   | N | HMGB3P10        | chr1:99698241-99699197    | N |  |  |  |
| HMGB3   | N | HMGB3P8         | chr10:116439209-116440067 | N |  |  |  |
| HMGB3   | N | HMGB3P5         | chr10:110450605-110452121 | N |  |  |  |
| HMGB3   | N | HMGB3P34        | chr11:87477706-87481337   | N |  |  |  |
| HMGB3   | N | HMGB3P7         | chr13:101801793-101803581 | N |  |  |  |

|       |   |          |                           |   |  |  |  |
|-------|---|----------|---------------------------|---|--|--|--|
| HMGB3 | N | HMGB3P26 | chr14:103364234-103364844 | N |  |  |  |
| HMGB3 | N | HMGB3P32 | chr16:57603098-57605532   | N |  |  |  |
| HMGB3 | N | HMGB3P27 | chr17:42648154-42648738   | N |  |  |  |
| HMGB3 | N | HMGB3P35 | chr18:12450417-12451057   | N |  |  |  |
| HMGB3 | N | HMGB3P36 | chr19:17417016-17418324   | N |  |  |  |
| HMGB3 | N | HMGB3P11 | chr2:104771191-104772745  | N |  |  |  |
| HMGB3 | N | HMGB3P2  | chr20:36076000-36076609   | N |  |  |  |
| HMGB3 | N | HMGB3P1  | chr20:34833564-34834486   | N |  |  |  |
| HMGB3 | N | HMGB3P12 | chr3:26216230-26218085    | N |  |  |  |
| HMGB3 | N | HMGB3P14 | chr3:134170401-134171142  | N |  |  |  |
| HMGB3 | N | HMGB3P15 | chr4:94195919-94196544    | N |  |  |  |
| HMGB3 | N | HMGB3P16 | chr5:112451842-112453021  | N |  |  |  |
| HMGB3 | N | HMGB3P22 | chr5:179694178-179694786  | N |  |  |  |
| HMGB3 | N | HMGB3P17 | chr5:123467942-123469475  | N |  |  |  |
| HMGB3 | N | HMGB3P19 | chr6:153938024-153939121  | N |  |  |  |
| HMGB3 | N | HMGB3P18 | chr6:121856769-121858746  | N |  |  |  |
| HMGB3 | N | HMGB3P20 | chr7:26981269-26983459    | N |  |  |  |
| HMGB3 | N | HMGB3P23 | chr9:31643345-31645184    | N |  |  |  |
| HMGB3 | N | HMGB3P24 | chr9:36302688-36305016    | N |  |  |  |
| HMGB3 | N | HMGB3P31 | chrX:134959064-134962399  | N |  |  |  |
| HMGB3 | N | HMGB3P30 | chrX:112689892-112691366  | N |  |  |  |
| KRT18 | N | KRT18P28 | chr1:182959007-182960364  | N |  |  |  |
| KRT18 | N | KRT18P12 | chr1:214532193-214533869  | N |  |  |  |
| KRT18 | N | KRT18P32 | chr1:238491356-238492715  | N |  |  |  |
| KRT18 | N | KRT18P14 | chr11:35860189-35861550   | N |  |  |  |
| KRT18 | N | KRT18P59 | chr11:125113568-125114938 | N |  |  |  |
| KRT18 | N | KRT18P58 | chr11:5993808-5995153     | N |  |  |  |
| KRT18 | N | KRT18P20 | chr12:104976684-104978028 | N |  |  |  |
| KRT18 | N | KRT18P60 | chr12:65418652-65420025   | N |  |  |  |
| KRT18 | N | KRT18P6  | chr14:35511731-35513091   | N |  |  |  |
| KRT18 | N | KRT18P7  | chr14:70594550-70595902   | N |  |  |  |

|       |   |          |                          |   |  |  |  |
|-------|---|----------|--------------------------|---|--|--|--|
| KRT18 | N | KRT18P47 | chr15:88959761-88961138  | N |  |  |  |
| KRT18 | N | KRT18P72 | chr17:67276067-67276349  | N |  |  |  |
| KRT18 | N | KRT18P61 | chr17:60810163-60811539  | N |  |  |  |
| KRT18 | N | KRT18P55 | chr17:28275967-28277338  | N |  |  |  |
| KRT18 | N | KRT18P8  | chr18:9678170-9679496    | N |  |  |  |
| KRT18 | N | KRT18P26 | chr2:74306653-74308010   | N |  |  |  |
| KRT18 | N | KRT18P52 | chr2:31822513-31823417   | N |  |  |  |
| KRT18 | N | KRT18P33 | chr2:65666469-65667813   | N |  |  |  |
| KRT18 | N | KRT18P39 | chr2:203764218-203765589 | N |  |  |  |
| KRT18 | N | KRT18P29 | chr2:181961149-181962480 | N |  |  |  |
| KRT18 | N | KRT18P19 | chr2:189311193-189312545 | N |  |  |  |
| KRT18 | N | KRT18P4  | chr20:49956740-49958106  | N |  |  |  |
| KRT18 | N | KRT18P3  | chr20:22732733-22734091  | N |  |  |  |
| KRT18 | N | KRT18P2  | chr21:20424882-20426169  | N |  |  |  |
| KRT18 | N | KRT18P23 | chr22:44566964-44568321  | N |  |  |  |
| KRT18 | N | KRT18P5  | chr22:20482391-20484107  | N |  |  |  |
| KRT18 | N | KRT18P62 | chr22:19257518-19258872  | N |  |  |  |
| KRT18 | N | KRT18P35 | chr3:141470548-141471902 | N |  |  |  |
| KRT18 | N | KRT18P43 | chr3:169902913-169904258 | N |  |  |  |
| KRT18 | N | KRT18P15 | chr3:32258941-32260302   | N |  |  |  |
| KRT18 | N | KRT18P34 | chr3:157162596-157163934 | N |  |  |  |
| KRT18 | N | KRT18P17 | chr3:12787335-12788670   | N |  |  |  |
| KRT18 | N | KRT18P54 | chr4:135371108-135371874 | N |  |  |  |
| KRT18 | N | KRT18P51 | chr4:144572238-144572986 | N |  |  |  |
| KRT18 | N | KRT18P25 | chr4:40020240-40021567   | N |  |  |  |
| KRT18 | N | KRT18P21 | chr4:115920705-115922351 | N |  |  |  |
| KRT18 | N | KRT18P63 | chr4:17911672-17913044   | N |  |  |  |
| KRT18 | N | KRT18P42 | chr5:109588337-109589660 | N |  |  |  |
| KRT18 | N | KRT18P16 | chr5:123636108-123637495 | N |  |  |  |
| KRT18 | N | KRT18P45 | chr5:80288448-80289854   | N |  |  |  |
| KRT18 | N | KRT18P31 | chr5:36885204-36886552   | N |  |  |  |

|       |   |          |                          |   |  |  |  |
|-------|---|----------|--------------------------|---|--|--|--|
| KRT18 | N | KRT18P9  | chr6:34189776-34191158   | N |  |  |  |
| KRT18 | N | KRT18P50 | chr6:95991115-95992398   | N |  |  |  |
| KRT18 | N | KRT18P22 | chr6:116457247-116458605 | N |  |  |  |
| KRT18 | N | KRT18P37 | chr8:41511239-41512590   | N |  |  |  |
| KRT18 | N | KRT18P67 | chr9:122837552-122838891 | N |  |  |  |
| KRT18 | N | KRT18P36 | chr9:30799422-30800750   | N |  |  |  |
| KRT18 | N | KRT18P66 | chr9:30773463-30774812   | N |  |  |  |
| KRT18 | N | KRT18P44 | chrX:128714504-128716141 | N |  |  |  |
| KRT18 | N | KRT18P49 | chrX:107428627-107429531 | N |  |  |  |
| KRT18 | N | KRT18P57 | chr1:111648206-111649597 | N |  |  |  |
| KRT18 | N | KRT18P18 | chr16:72728565-72729982  | N |  |  |  |
| KRT18 | N | KRT18P40 | chr19:20961058-20965274  | N |  |  |  |
| KRT18 | N | KRT18P46 | chr2:161580035-161581419 | N |  |  |  |
| KRT18 | N | KRT18P41 | chr5:170140596-170141987 | N |  |  |  |
| KRT18 | N | KRT18P56 | chr5:40066609-40067201   | N |  |  |  |
| KRT18 | N | KRT18P38 | chr6:19612695-19614090   | N |  |  |  |
| KRT18 | N | KRT18P64 | chr6:85287676-85289068   | N |  |  |  |
| KRT18 | N | KRT18P1  | chr6:28969076-28970467   | N |  |  |  |
| KRT18 | N | KRT18P65 | chr6:112361373-112362775 | N |  |  |  |
| KRT18 | N | KRT18P24 | chr9:79036337-79037748   | N |  |  |  |
| KRT18 | N | KRT18P13 | chr9:97698872-97700801   | N |  |  |  |
| KRT18 | N | KRT18P68 | chrX:45983322-45984369   | N |  |  |  |
| KRT18 | N | KRT18P48 | chrX:153604514-153605390 | N |  |  |  |
