# Supplementary material for: Retro-miRs: novel and functional miRNAs originating from mRNA retrotransposition
Source: Springer Nature journal article supplement (doi:10.1186/s13100-023-00301-w), 2023-09-08
Supplement: MOESM4 [file 13100_2023_301_MOESM4_ESM.pdf]

**Table S3. Duplications of protein coding genes containing exonic miRNAs.**

| DNA mediated duplications     |                          |            |            |                           |            |
|-------------------------------|--------------------------|------------|------------|---------------------------|------------|
| Gene1                         | Genomic position         | With miRNA | Gene2      | Genomic Position          | With miRNA |
| CCNYL1                        | chr2:207711540-207761839 | Y          | CCNY       | chr10:35247025-35572669   | N          |
| EHD1                          | chr11:64851642-64888296  | Y          | EHD3       | chr2:31234152-31269451    | N          |
| EHD1                          | chr11:64851642-64888296  | Y          | EHD4       | chr15:41895933-41972557   | N          |
| EHD1                          | chr11:64851642-64888296  | Y          | EHD2       | chr19:47713422-47743134   | N          |
| EML2                          | chr19:45606994-45645629  | Y          | EML1       | chr14:99737693-99942060   | N          |
| F8A3                          | chrX:155456914-155458672 | Y          | F8A2       | chrX:155382115-155383230  | Y          |
| F8A3                          | chrX:155456914-155458672 | Y          | F8A1       | chrX:154886349-154888061  | Y          |
| FADS1                         | chr11:61799627-61829318  | Y          | FADS2      | chr11:61792980-61867354   | N          |
| FADS1                         | chr11:61799627-61829318  | Y          | FADS3      | chr11:61873519-61892051   | N          |
| FKBP1A                        | chr20:1368978-1393172    | Y          | FKBP1B     | chr2:24049701-24063681    | N          |
| GNAI3                         | chr1:109548615-109618324 | Y          | GNAI1      | chr7:79768028-80226181    | N          |
| GNAI3                         | chr1:109548615-109618324 | Y          | GNAI2      | chr3:50226292-50259362    | N          |
| GNAI3                         | chr1:109548615-109618324 | Y          | GNAO1      | chr16:56191489-56357444   | N          |
| GNAI3                         | chr1:109548615-109618324 | Y          | GNAZ       | chr22:23070519-23125032   | N          |
| GNAI3                         | chr1:109548615-109618324 | Y          | GNAT3      | chr7:80458635-80512064    | N          |
| GNAI3                         | chr1:109548615-109618324 | Y          | GNAT2      | chr1:109603254-109619929  | N          |
| GNAI3                         | chr1:109548615-109618324 | Y          | GNAT1      | chr3:50191610-50197696    | N          |
| GNAI3                         | chr1:109548615-109618324 | Y          | GNA14      | chr9:77423079-77648322    | N          |
| GNAI3                         | chr1:109548615-109618324 | Y          | GNA13      | chr17:65009289-65056740   | N          |
| GNAI3                         | chr1:109548615-109618324 | Y          | GNA11      | chr19:3094362-3123999     | N          |
| HNRNPA3                       | chr2:177212563-177223958 | Y          | HNRNPA2B17 | chr7:26173057-26201529    | N          |
| NR2F2                         | chr15:96325938-96340263  | Y          | NR2F1      | chr5:93583222-93594611    | N          |
| PABPC1                        | chr8:100685816-100722809 | Y          | PABPC4     | chr1:39560816-39576790    | N          |
| PABPC1                        | chr8:100685816-100722809 | Y          | PABPC1L    | chr20:44910062-44959035   | N          |
| PILRB                         | chr7:100352176-100367733 | Y          | PILRA      | chr7:100367530-100400096  | N          |
| PLEKHM1                       | chr17:45435900-45490749  | Y          | PLEKHM1P1  | chr17:64779259-64837154   | Y          |
| PURB                          | chr7:44876299-44885530   | Y          | PURA       | chr5:140107777-140125619  | N          |
| RBMS1                         | chr2:160272151-160493807 | Y          | RBMS3      | chr3:28574791-30010391    | N          |
| RBMS1                         | chr2:160272151-160493807 | Y          | RBMS2      | chr12:56521820-56596193   | N          |
| SERF2                         | chr15:43777087-43802589  | Y          | SERF1A     | chr5:70900665-70918530    | N          |
| TAOK1                         | chr17:29390464-29551904  | Y          | TAOK2      | chr16:29973868-29992261   | N          |
| TAOK1                         | chr17:29390464-29551904  | Y          | TAOK3      | chr12:118149801-118372907 | N          |
| USP15                         | chr12:62260338-62417431  | Y          | USP11      | chrX:47232690-47248328    | N          |
| USP15                         | chr12:62260338-62417431  | Y          | USP4       | chr3:49277144-49340712    | N          |
| USP15                         | chr12:62260338-62417431  | Y          | USP32      | chr17:60177327-60422470   | N          |
| USP15                         | chr12:62260338-62417431  | Y          | USP6       | chr17:5116438-5175034     | N          |
| <b>mRNA retroduplications</b> |                          |            |            |                           |            |

| Parental | Genomic position          | With miRNA | RTC-Genomic Position     | With miRNA |
|----------|---------------------------|------------|--------------------------|------------|
| ANKRD54  | chr22:37830855-37844334   | Y          | chr10:45646374-45647605  | N          |
| BUD31    | chr7:99408641-99419616    | Y          | chrX:74421305-74421818   | N          |
| CCNYL1   | chr2:207711640-207756174  | Y          | chr19:21933414-21937189  | N          |
| CCNYL1   | chr2:207711640-207756174  | Y          | chrX:65037743-65042051   | N          |
| CDC37    | chr19:10391133-10403542   | Y          | chr16:28425100-28427082  | N          |
| CDC37    | chr19:10391133-10403542   | Y          | chr16:28711207-28712857  | N          |
| CDC37    | chr19:10391133-10403542   | Y          | chr5:157413153-157414724 | N          |
| EED      | chr11:86244753-86278810   | Y          | chr4:83492292-83492965   | N          |
| EED      | chr11:86244753-86278810   | Y          | chrX:139479271-139480704 | N          |
| FKBP1A   | chr20:1369000-1393123     | Y          | chr13:47079253-47082644  | N          |
| FKBP1A   | chr20:1369000-1393123     | Y          | chr15:73434434-73435931  | N          |
| FKBP1A   | chr20:1369000-1393123     | Y          | chr19:58336594-58338233  | N          |
| FKBP1A   | chr20:1369000-1393123     | Y          | chr3:149180387-149181989 | N          |
| FKBP1A   | chr20:1369000-1393123     | Y          | chr6:63921356-63922932   | N          |
| HAUS4    | chr14:22946228-22957154   | Y          | chr1:170338060-170339530 | N          |
| HNRNPA3  | chr2:177212724-177223920  | Y          | chr3:75214631-75215636   | Y          |
| HNRNPA3  | chr2:177212724-177223920  | Y          | chr1:81426421-81428335   | N          |
| HNRNPA3  | chr2:177212724-177223920  | Y          | chr1:113449660-113451119 | N          |
| HNRNPA3  | chr2:177212724-177223920  | Y          | chr10:43787125-43790442  | N          |
| HNRNPA3  | chr2:177212724-177223920  | Y          | chr11:32591403-32592766  | N          |
| HNRNPA3  | chr2:177212724-177223920  | Y          | chr12:51711727-51713612  | N          |
| HNRNPA3  | chr2:177212724-177223920  | Y          | chr13:65787546-65788763  | N          |
| HNRNPA3  | chr2:177212724-177223920  | Y          | chr15:57246585-57248086  | N          |
| HNRNPA3  | chr2:177212724-177223920  | Y          | chr18:50814324-50816778  | N          |
| HNRNPA3  | chr2:177212724-177223920  | Y          | chr19:54031410-54031766  | N          |
| HNRNPA3  | chr2:177212724-177223920  | Y          | chr2:216174173-216176040 | N          |
| HNRNPA3  | chr2:177212724-177223920  | Y          | chr2:197014990-197016725 | N          |
| HNRNPA3  | chr2:177212724-177223920  | Y          | chr20:36620402-36621442  | N          |
| HNRNPA3  | chr2:177212724-177223920  | Y          | chr4:40142207-40142402   | N          |
| HNRNPA3  | chr2:177212724-177223920  | Y          | chr4:82128528-82131631   | N          |
| HNRNPA3  | chr2:177212724-177223920  | Y          | chr6:25271821-25273808   | N          |
| HNRNPA3  | chr2:177212724-177223920  | Y          | chrX:140032318-140033870 | N          |
| HSP90B1  | chr12:103930410-103947926 | Y          | chr1:92108076-92109892   | N          |
| HSP90B1  | chr12:103930410-103947926 | Y          | chr15:99797731-99800481  | N          |
| IK       | chr5:140647829-140662480  | Y          | chr2:58687309-58689167   | N          |
| LSP1     | chr11:1853084-1892263     | Y          | chr5:28926928-28927133   | N          |
| PABPC1   | chr8:100702795-100722762  | Y          | chr12:63822021-63823895  | Y          |
| PABPC1   | chr8:100702795-100722762  | Y          | chr4:39973444-39974338   | N          |
| PABPC1   | chr8:100702795-100722762  | Y          | chr2:146587506-146589310 | N          |

|        |                          |   |                           |   |
|--------|--------------------------|---|---------------------------|---|
| PABPC1 | chr8:100702795-100722762 | Y | chrX:74583088-74583546    | N |
| PABPC1 | chr8:100702795-100722762 | Y | chr4:102896725-102898237  | N |
| PABPC1 | chr8:100702795-100722762 | Y | chr3:155309427-155309807  | N |
| PABPC1 | chr8:100702795-100722762 | Y | chr9:17589161-17591318    | N |
| PABPC1 | chr8:100702795-100722762 | Y | chr4:39973128-39973442    | N |
| PABPC1 | chr8:100702795-100722762 | Y | chr13:25096141-25099255   | N |
| PTMA   | chr2:231708516-231713536 | Y | chr5:118973796-118974122  | Y |
| PTMA   | chr2:231708516-231713536 | Y | chr12:9239986-9240331     | Y |
| PTMA   | chr2:231708516-231713536 | Y | chr12:12111163-12111489   | Y |
| PTMA   | chr2:231708516-231713536 | Y | chr3:117026698-117027039  | Y |
| PTMA   | chr2:231708516-231713536 | Y | chr14:92026422-92027567   | Y |
| PTMA   | chr2:231708516-231713536 | Y | chr6:30633632-30633956    | N |
| PTMA   | chr2:231708516-231713536 | Y | chr20:18011955-18012284   | N |
| PTMA   | chr2:231708516-231713536 | Y | chr13:81689911-81691072   | N |
| PTMA   | chr2:231708516-231713536 | Y | chr7:138404195-138404523  | N |
| PTMA   | chr2:231708516-231713536 | Y | chr17:76651409-76652084   | N |
| PTMA   | chr2:231708516-231713536 | Y | chrX:15653107-15653855    | N |
| PTMA   | chr2:231708516-231713536 | Y | chr8:103559099-103559389  | N |
| RAD21  | chr8:116845934-116874776 | Y | chrX:100056102-100059587  | N |
| RBBP8  | chr18:22933328-23026486  | Y | chr11:109855990-109856384 | N |
| RBMS1  | chr2:160272151-160493807 | Y | chr12:66626794-66629010   | N |
| RPS5   | chr19:58386400-58394806  | Y | chr1:212997300-212997862  | N |
| RPS5   | chr19:58386400-58394806  | Y | chr21:34853847-34854531   | N |
| RPS5   | chr19:58386400-58394806  | Y | chr21:35507691-35508399   | N |
| RPS5   | chr19:58386400-58394806  | Y | chr6:116579589-116580350  | N |
| RPS5   | chr19:58386400-58394806  | Y | chr8:81213033-81213750    | N |
| RPS5   | chr19:58386400-58394806  | Y | chr9:4781401-4782105      | N |
| RPS5   | chr19:58386400-58394806  | Y | chrX:6340077-6340795      | N |
| RPS5   | chr19:58386400-58394806  | Y | chrX:109096516-109097181  | N |
