# Supplementary material for: Retro-miRs: novel and functional miRNAs originating from mRNA retrotransposition
Source: Springer Nature journal article supplement (doi:10.1186/s13100-023-00301-w), 2023-09-08
Supplement: MOESM5 [file 13100_2023_301_MOESM5_ESM-1.pdf]

Table S4. Conservation of retro-miRs and retrocopies.

| retro-miR  | Retrocopy     | Retrocopy                       |               |                 |                |                 |          |         | retro-miR                       |               |                 |                |                 |          |         |
|------------|---------------|---------------------------------|---------------|-----------------|----------------|-----------------|----------|---------|---------------------------------|---------------|-----------------|----------------|-----------------|----------|---------|
|            |               | Human                           | Chimp         | Gorilla         | Orangutan      | Rhesus          | Marmoset | Rodents | Human                           | Chimp         | Gorilla         | Orangutan      | Rhesus          | Marmoset | Rodents |
| mir-4444-2 | HNRNPA3P6     | chr3:75214631-7                 | -             | -               | -              | -               | -        | -       | chr3:75214476-7                 | -             | -               | -              | -               | -        | -       |
| mir-4426   | RPS27AP5      | chr1:192716132                  | -             | -               | -              | -               | -        | -       | chr1:192716328                  | -             | -               | -              | -               | -        | -       |
| mir-4426-1 | RPS27AP16     | chr16:61055399- chr16:60201463  | -             | -               | -              | -               | -        | -       | chr16:61055707- chr16:60201753  | -             | -               | -              | -               | -        |         |
| mir-1244-2 | PTMAP2        | chr5:118973796- chr5:119512345  | -             | -               | -              | -               | -        | -       | chr5:118974586- chr5:119513334  | -             | -               | -              | -               | -        |         |
| mir-1244-3 | PTMAP4        | chr12:9239986-9 chr12:9474823-9 | CYUI01015004v | -               | -              | -               | -        | -       | chr12:9239467-9 chr12:9474428-9 | CYUI01015004v | -               | -              | -               | -        |         |
| mir-1244-4 | PTMAP9        | chr12:12111163- chr12:12375093  | -             | -               | -              | -               | -        | -       | chr12:12111952- chr12:12376069  | -             | -               | -              | -               | -        |         |
| mir-1244-5 | PTMAP8        | chr3:117026698- chr3:120385710  | CYUI01014906v | chr3:15708894-1 | -              | -               | -        | -       | chr3:117027474- chr3:120386687  | CYUI01014906v | chr3:15709058-1 | -              | -               | -        |         |
| mir-1244-6 | RP11-529H20.3 | chr14:92026422- chr14:91576317  | CYUI01014949v | chr14:93322770  | -              | -               | -        | -       | chr14:92027342- chr14:91577259  | CYUI01014949v | chr14:93323711  | -              | -               | -        |         |
| mir-3654   | RP11-371A22.1 | chr7:133034607- chr7:134529704  | CYUI01015523v | -               | -              | -               | -        | -       | chr7:133034860- chr7:134530035  | CYUI01015523v | -               | -              | -               | -        |         |
| mir-3654-1 | EEF1GP5       | chrX:115702811- chrX:116313511  | CYUI01000089v | chrX:114670727  | chrX:109559802 | -               | -        | -       | chrX:115703812- chrX:116314532  | CYUI01000089v | chrX:114671749  | chrX:109560804 | -               | -        |         |
| mir-572    | RNPS1P1       | chr4:11368821-1 chr4:11084202-1 | CYUI01000005v | -               | -              | -               | -        | -       | chr4:11368827-1 chr16:2541092-2 | CYUI01000005v | -               | -              | -               | -        |         |
| mir-622    | KRT18P27      | chr13:90230384- chr13:90373952  | CYUI01015187v | chr13:92202953  | chr17:72037066 | -               | -        | -       | chr13:90231182- chr13:90374755  | CYUI01015187v | chr13:92202802  | chr17:72037918 | -               | -        |         |
| mir-7161   | TATDN2P2      | chr6:158609706- chr6:160364810  | CYUI01015032v | chr6:162047714  | chr4:107336327 | chr4:159665537  | -        | -       | chr6:158609707- chr6:160365189  | CYUI01015032v | chr6:162048113  | chr4:107346872 | chr4:159665538  | -        |         |
| mir-4788   | HMG3P13       | chr3:134437605- chr3:137949619  | CYUI01014939v | chr3:136839589  | chr2:167554563 | chr17:42034131  | -        | -       | chr3:134437827- chr3:137949845  | CYUI01014939v | chr3:136839815  | chr2:167556046 | chr17:42034879  | -        |         |
| mir-4468   | RCC2P3        | chr7:138122202- chr7:139612214  | CYUI01015182v | chr7:135290828  | chr3:164476602 | chr8:108025628  | -        | -       | chr7:138123758- chr7:139613523  | CYUI01015182v | chr7:135292125  | chr3:164477901 | chr8:108026249  | -        |         |
| mir-492    | KRT19P2       | chr12:94834147- chr12:95064290  | CYUI01014962v | chr12:95974676  | chr11:94645995 | chr9:84853867-8 | -        | -       | chr12:94834398- chr12:95064554  | CYUI01014962v | chr12:95974944  | chr11:94645766 | chr9:84854140-8 | -        |         |
| mir-10527  | PABPC1P4      | chr12:63822021- chr12:25448463  | CYUI01015004v | chr12:63817020  | chr11:62577992 | chr9:52830816-5 | -        | -       | chr12:63823663- chr12:25449068  | CYUI01015004v | chr12:63819051  | chr11:62579882 | chr9:52833049-5 | -        |         |
