# Supplementary material for: Retro-miRs: novel and functional miRNAs originating from mRNA retrotransposition
Source: Springer Nature journal article supplement (doi:10.1186/s13100-023-00301-w), 2023-09-08
Supplement: MOESM6 [file 13100_2023_301_MOESM6_ESM.pdf]

Table S5. Dn/Ds analysis

| RTCs          | Position                 | Parental Gene | Parental mRNA  | miRNA          | miRNA type         | dNdS RTC | neutrality test | Identity of CDS' nucleotides | Comparison |
|---------------|--------------------------|---------------|----------------|----------------|--------------------|----------|-----------------|------------------------------|------------|
| HNRNPA3P6     | chr3:75214462-75215755   | HNRNPA3       | NM_001330247.1 | hsa-mir-4444-2 | Retrocopied        | 0.9273   | 0.1305          | 97.73%                       | Paralog    |
| RPS27AP5      | chr1:192716145-192716683 | RPS27A        | NM_002954.6    | hsa-mir-4426   | Exon-exon Junction | 0.8186   | 0.2506          | 98.41%                       | Paralog    |
| RPS27AP16     | chr16:61055415-61055938  | RPS27A        | NM_002954.6    | hsa-mir-4426-1 | Exon-exon Junction | 0.6005   | 0.0618          | 99.05%                       | Ortholog   |
| PTMAP2        | chr5:118973562-118974812 | PTMA          | NM_002823.5    | hsa-mir-1244-2 | Retrocopied        | 1.0802   | 0.4298          | 95.75%                       | Ortholog   |
| PTMAP9        | chr12:12110982-12112171  | PTMA          | NM_002823.5    | hsa-mir-1244-4 | Retrocopied        | 0.593    | 0.2096          | 97.60%                       | Ortholog   |
| PTMAP4        | chr12:9239321-9240496    | PTMA          | NM_002823.5    | hsa-mir-1244-3 | Retrocopied        | 0.6649   | 0.2865          | 97.46%                       | Ortholog   |
| RP11-371A22.1 | chr7:133034529-133035940 | EEF1G         | NM_001404.5    | hsa-mir-3654   | Exon-exon Junction | 0.8777   | 0.2925          | 98.79%                       | Ortholog   |
| RNPS1P1       | chr4:11368602-11373739   | RNPS1         | XM_005255049.4 | hsa-mir-572    | Novel              | 0.6505   | 0.1624          | 98.15%                       | Ortholog   |
| PTMAP8        | chr3:117026518-117027707 | PTMA          | NM_002823.5    | hsa-mir-1244-5 | Retrocopied        | 3.4166   | 0.0481          | 97.73%                       | Ortholog   |
| RP11-529H20.3 | chr14:92026422-92027567  | PTMA          | NM_002823.5    | hsa-mir-1244-6 | Retrocopied        | 0.1798   | 0.0093          | 97.03%                       | Ortholog   |
| EEF1GP5       | chrX:115702791-115704195 | EEF1G         | NM_001404.5    | hsa-mir-3654-1 | Exon-exon Junction | 1.0182   | 0.4881          | 98.55%                       | Ortholog   |
| KRT18P27      | chr13:90230379-90231737  | KRT18         | NM_199187.2    | hsa-mir-622    | Exon-exon Junction | 0.6624   | 0.2998          | 98.61%                       | Ortholog   |
| TATDN2P2      | chr6:158609337-158621992 | TATDN2        | NM_014760.4    | hsa-mir-7161   | Novel              | 0.5527   | 0.0500          | 97.30%                       | Ortholog   |
| HMGB3P13      | chr3:134437600-134439066 | HMGB3         | XM_024452369.1 | hsa-mir-4788   | Novel              | NA       | NA              | 98.59%                       | Ortholog   |
| RCC2P3        | chr7:138122426-138124769 | RCC2          | NM_018715.4    | hsa-mir-4468   | Novel              | NA       | NA              | 98.39%                       | Ortholog   |
| KRT19P2       | chr12:94834247-94835283  | KRT19         | NM_002276.5    | hsa-mir-492    | Exon-exon Junction | 2.1887   | 0.2191          | 98.50%                       | Ortholog   |
| PABPC1P4      | chr12:63821537-63824341  | PABPC1        | XM_005250861.3 | hsa-mir-10527  | Exon-exon Junction | 0.4408   | 0.1052          | 97.15%                       | Ortholog   |
